# Supplementary material for: Site Mutation Improves the Expression and Antimicrobial Properties of Fungal Defense
Source: MDPI journal article supplement (doi:10.3390/antibiotics12081283), 2023-08-03
Supplement: s1 [file s1]

**Site mutation and screening of fungal defense with high expression and bioactivity**

Ya Hao <sup>1, 2, 3\*</sup>, Da Teng <sup>1, 2, 3</sup>, Ruoyu Mao <sup>1, 2, 3</sup>, Na Yang <sup>1, 2, 3</sup>, and Jianhua Wang <sup>1, 2, 3\*</sup>

1, Gene Engineering Laboratory, Feed Research Institute, Chinese Academy of Agricultural Sciences, Beijing 100081, China

2, Innovative Team of Antimicrobial Peptides and Alternatives to Antibiotics, Feed Research Institute, Chinese Academy of Agricultural Sciences, Beijing 100081, China

3, Key Laboratory of Feed Biotechnology, Ministry of Agriculture and Rural Affairs, Beijing 100081, China

\* Corresponding authors

(1) Ya Hao, email address: haoya@caas.cn

(2) Jianhua Wang, as the sole contact during this submission

Feed Research Institute, Chinese Academy of Agricultural Sciences,

12 Zhongguancun Nandajie St., Haidian District, Beijing 100081, China

E-mail address: wangjianhua@caas.cn

Phone/Fax: +86-10-82106081, +86-10-82106079

**A**

| Parameters | Glucose   | Ca <sup>2+</sup> | Phosphorous | Urea Nitrogen | Creatinine | Total protein | Albumin    | Globulin   | ALB/GLO   | AST        | ALT        | AST/ALT   |
|------------|-----------|------------------|-------------|---------------|------------|---------------|------------|------------|-----------|------------|------------|-----------|
| Unit       | mmol/L    | mmol/L           | mmol/L      | mmol/L        | μmol/L     | g/L           | g/L        | g/L        |           | IU/L       | IU/L       |           |
| CK         | 1.55±0.09 | 1.39±0.02        | 3.03±0.11   | 9.77±0.58     | 94.82±2.91 | 51.32±1.74    | 31.84±1.41 | 19.48±0.86 | 1.64±0.09 | 27.43±1.12 | 52.12±1.54 | 0.53±0.01 |
| PN7        | 1.61±0.05 | 1.36±0.02        | 3.08±0.10   | 10.13±0.59    | 97.08±6.55 | 48.99±1.60    | 30.14±0.66 | 18.86±1.15 | 1.61±0.09 | 32.85±1.56 | 60.06±5.25 | 0.56±0.03 |

**B**

| Parameters | RBC                 | HBG         | HCT        | MCV        | MCH        | MCHC       | PLT                | MPV       | PDW        | PCT       | RDW-CV             | RDW-SD     |
|------------|---------------------|-------------|------------|------------|------------|------------|--------------------|-----------|------------|-----------|--------------------|------------|
| Unit       | 10 <sup>12</sup> /L | g/L         | %          | fL         | pg         | g/L        | 10 <sup>9</sup> /L | fL        | %          | %         | 10 <sup>9</sup> /L | %          |
| CK         | 9.23±0.27           | 120.00±2.35 | 38.85±1.20 | 40.13±1.21 | 12.88±0.26 | 32.53±0.69 | 847.00±26.62       | 6.48±0.23 | 15.73±0.29 | 0.06±0.01 | 17.85±0.15         | 42.35±2.42 |
| PN7        | 8.84±0.31           | 115.25±4.85 | 38.60±1.42 | 40.27±0.38 | 12.73±0.42 | 31.95±0.33 | 798.25±40.12       | 6.58±0.31 | 16.13±0.40 | 0.03      | 17.58±0.39         | 40.93±1.20 |

**C**

| Parameters | WBC                | NEUT               | LYM                | MONO               | EO                 | BASO               | NEUT%      | LYM%       | MONO%     | EO%       | BASO%     |
|------------|--------------------|--------------------|--------------------|--------------------|--------------------|--------------------|------------|------------|-----------|-----------|-----------|
| Unit       | 10 <sup>9</sup> /L | %          | %          | %         | %         | %         |
| CK         | 11.39±0.73         | 2.86±0.31          | 7.40±0.25          | 0.57±0.13          | 0.28±0.03          | 0.29±0.03          | 24.88±1.26 | 65.37±2.24 | 4.83±0.96 | 2.42±0.25 | 2.50±0.14 |
| PN7        | 13.20±2.01         | 3.66±0.97          | 8.16±0.66          | 0.76±0.24          | 0.35±0.08          | 0.27±0.07          | 26.26±3.30 | 63.98±4.79 | 5.25±1.11 | 2.58±0.25 | 1.94±0.25 |

**Figure S1** Serum biochemical indices (A) and whole-blood cell profiles (B and C) of mice (ICR mice (6-8 weeks old, male, n = 5 per group; Charles River, Beijing) were intra-peritoneally injected with PN7 (10 mg/kg, body weight) for 6 days). Data are representative of three biological replicates and the mean was shown.
